# Supplementary material for: Genetic Diversity, Structure, and Differentiation of Pinus sylvestris L. Populations in the East European Plain and the Middle Urals
Source: MDPI journal article supplement (doi:10.3390/f13111798), 2022-10-29
Supplement: s1 [file s1]

**Supplementary Table S1.** The studied populations of *P.sylvestris* used in ISSR analysis.

| <b>Population</b> | <b>Location</b>                            | <b>Coordinates</b>        |
|-------------------|--------------------------------------------|---------------------------|
| <i>PS_KOCh</i>    | Perm Krai, Kochyovo's forestry             | N: 59.614878 E: 54.438009 |
| <i>PS_SOSN</i>    | Perm Krai, Gainy's forestry                | N: 60.341429 E: 53.840531 |
| <i>PS_KISH</i>    | Perm Krai, Kishert's forestry              | N: 57.359558 E: 57.171923 |
| <i>PS_LENI</i>    | Perm Krai, Kudymkar's forestry             | N: 58.692572 E: 54.694052 |
| <i>PS_ChER</i>    | Perm Krai, Cherdyn's forestry              | N: 60.433611 E: 56.307557 |
| <i>PS_ROMA</i>    | Perm Krai, Berezniki's forestry            | N: 59.146163 E: 56.794847 |
| <i>PS_LOKC</i>    | Komi Republic, Lokchim's forestry          | N: 61.349444 E: 51.912500 |
| <i>PS_SYSO</i>    | Komi Republic, Sysolsky's forestry         | N: 61.013889 E: 49.907500 |
| <i>PS_KRAS</i>    | Arkhangelsk Oblast, Krasnoborsk's forestry | N: 61.530278 E: 45.945556 |
| <i>PS_VELI</i>    | Vologda Oblast, Velikoustyugsky's forestry | N: 60.450556 E: 46.045000 |
| <i>PS_PYSH</i>    | Kostroma Oblast, Pyshchugsky's forestry    | N: 58.833611 E: 45.694167 |
| <i>PS_UREN</i>    | Nizhny Novgorod Oblast, Urensky's forestry | N: 57.434167 E: 45.838611 |
| <i>PS_KORO</i>    | Mari El Republic, Korotni's forestry       | N: 56.638611 E: 46.204722 |
| <i>PS_KOKSh</i>   | Mari El Republic, Kokshaysk's forestry     | N: 56.251944 E: 47.589722 |
| <i>PS_KIRS</i>    | Chuvash Republic, Kirsks's forestry        | N: 55.086944 E: 46.882500 |
| <i>PS_INZE</i>    | Ulyanovsk Oblast, Inzensky's forestry      | N: 53.876111 E: 46.388056 |
| <i>PS_SHAB</i>    | Kirov Oblast, Shabalinsky's forestry       | N: 58.752500 E: 47.267222 |
| <i>PS_YEZH</i>    | Kirov Oblast, Yezhikhinsk's forestry       | N: 58.058056 E: 47.703889 |
| <i>PS_DARO</i>    | Kirov Oblast, Darovskoy's forestry         | N: 58.756111 E: 48.122778 |
| <i>PS_YURY</i>    | Kirov Oblast, Yuryansky's forestry         | N: 59.084444 E: 49.290278 |
| <i>PS_SLOB</i>    | Kirov Oblast, Slobodskoy's forestry        | N: 58.738056 E: 50.075278 |
| <i>PS_BELO</i>    | Kirov Oblast, Belokholunitsky's forestry   | N: 58.771667 E: 50.943333 |

International geographical latitude designations: N - northern latitude; E - Eastern longitude

**Supplementary Table S2.** Pairwise geographic distances (km) between the studied populations of *P. sylvestris*. *PS\_KOCh*, *PS\_SOSN*, *PS\_KISH*, *PS\_LENI*, *PS\_ChER*, *PS\_ROMA*, *PS\_LOKC*, *PS\_SYSO*, *PS\_KRAS*, *PS\_VELI*, *PS\_PYSH*, *PS\_UREN*, *PS\_KORO*, *PS\_KOKSh*, *PS\_KIRS*, *PS\_INZE*, *PS\_SHAB*, *PS\_YEZH*, *PS\_DARO*, *PS\_YURY*, *PS\_SLOB* - population designations.

| <i>PS_KOCh</i> | <i>PS_SOSN</i> | <i>PS_KISH</i> | <i>PS_LENI</i> | <i>PS_ChER</i> | <i>PS_ROMA</i> | <i>PS_LOKC</i> | <i>PS_SYSO</i> | <i>PS_KRAS</i> | <i>PS_VELI</i> | <i>PS_PYSH</i> | <i>PS_UREN</i> | <i>PS_KORO</i> | <i>PS_KOKSh</i> | <i>PS_KIRS</i> | <i>PS_INZE</i> | <i>PS_SHAB</i> | <i>PS_YEZH</i> | <i>PS_DARO</i> | <i>PS_YURY</i> | <i>PS_SLOB</i> |                 |
|----------------|----------------|----------------|----------------|----------------|----------------|----------------|----------------|----------------|----------------|----------------|----------------|----------------|-----------------|----------------|----------------|----------------|----------------|----------------|----------------|----------------|-----------------|
| 87             | 0              |                |                |                |                |                |                |                |                |                |                |                |                 |                |                |                |                |                |                |                | <i>PS_SOSN</i>  |
| 297            | 383            | 0              |                |                |                |                |                |                |                |                |                |                |                 |                |                |                |                |                |                |                | <i>PS_KISH</i>  |
| 104            | 190            | 208            | 0              |                |                |                |                |                |                |                |                |                |                 |                |                |                |                |                |                |                | <i>PS_LENI</i>  |
| 138            | 136            | 345            | 214            | 0              |                |                |                |                |                |                |                |                |                 |                |                |                |                |                |                |                | <i>PS_ChER</i>  |
| 143            | 212            | 200            | 131            | 146            | 0              |                |                |                |                |                |                |                |                 |                |                |                |                |                |                |                | <i>PS_ROMA</i>  |
| 237            | 153            | 534            | 333            | 259            | 364            | 0              |                |                |                |                |                |                |                 |                |                |                |                |                |                |                | <i>PS_LOKC</i>  |
| 294            | 227            | 579            | 371            | 354            | 434            | 114            | 0              |                |                |                |                |                |                 |                |                |                |                |                |                |                | <i>PS_SYSO</i>  |
| 510            | 446            | 784            | 578            | 571            | 652            | 318            | 219            | 0              |                |                |                |                |                 |                |                |                |                |                |                |                | <i>PS_KRAS</i>  |
| 475            | 428            | 724            | 524            | 562            | 618            | 333            | 219            | 120            | 0              |                |                |                |                 |                |                |                |                |                |                |                | <i>PS_VELI</i>  |
| 505            | 488            | 693            | 519            | 622            | 636            | 444            | 337            | 300            | 181            | 0              |                |                |                 |                |                |                |                |                |                |                | <i>PS_PYSH</i>  |
| 419            | 410            | 602            | 429            | 542            | 548            | 387            | 291            | 317            | 201            | 91             | 0              |                |                 |                |                |                |                |                |                |                | <i>PS_UREN</i>  |
| 424            | 432            | 567            | 413            | 555            | 540            | 435            | 351            | 398            | 282            | 145            | 81             | 0              |                 |                |                |                |                |                |                |                | <i>PS_KORO</i>  |
| 554            | 561            | 678            | 539            | 686            | 667            | 554            | 460            | 456            | 336            | 156            | 169            | 131            | 0               |                |                |                |                |                |                |                | <i>PS_KOKSh</i> |
| 585            | 605            | 668            | 554            | 721            | 684            | 617            | 531            | 544            | 424            | 246            | 243            | 182            | 91              | 0              |                |                |                |                |                |                | <i>PS_KIRS</i>  |
| 550            | 583            | 596            | 504            | 688            | 634            | 619            | 546            | 594            | 475            | 309            | 279            | 201            | 169             | 95             | 0              |                |                |                |                |                | <i>PS_INZE</i>  |
| 677            | 715            | 684            | 621            | 815            | 748            | 756            | 682            | 719            | 598            | 423            | 408            | 334            | 269             | 178            | 137            | 0              |                |                |                |                | <i>PS_SHAB</i>  |
| 804            | 847            | 779            | 740            | 941            | 865            | 893            | 821            | 852            | 731            | 553            | 545            | 472            | 397             | 307            | 275            | 138            | 0              |                |                |                | <i>PS_YEZH</i>  |
| 372            | 367            | 554            | 379            | 497            | 499            | 357            | 270            | 331            | 222            | 140            | 49             | 81             | 199             | 262            | 280            | 415            | 553            | 0              |                |                | <i>PS_DARO</i>  |
| 298            | 291            | 499            | 313            | 420            | 428            | 290            | 217            | 328            | 237            | 208            | 122            | 147            | 273             | 327            | 331            | 468            | 606            | 76             | 0              |                | <i>PS_YURY</i>  |
| 267            | 277            | 445            | 267            | 398            | 388            | 308            | 253            | 385            | 296            | 253            | 162            | 157            | 288             | 328            | 314            | 450            | 586            | 113            | 59             | 0              | <i>PS_SLOB</i>  |
| 220            | 239            | 398            | 217            | 354            | 338            | 292            | 256            | 413            | 333            | 302            | 212            | 205            | 335             | 368            | 344            | 478            | 612            | 163            | 101            | 50             | <i>PS_BELO</i>  |

**Supplementary Table S3.** Paired *PhiPT* genetic distances between the studied populations of *P. sylvestris* by AMOVA. *PS\_KOCh*, *PS\_SOSN*, *PS\_KISH*, *PS\_LENI*, *PS\_ChER*, *PS\_ROMA*, *PS\_LOKC*, *PS\_SYSO*, *PS\_KRAS*, *PS\_VELI*, *PS\_PYSH*, *PS\_UREN*, *PS\_KORO*, *PS\_KOKSh*, *PS\_KIRS*, *PS\_INZE*, *PS\_SHAB*, *PS\_YEZH*, *PS\_DARO*, *PS\_YURY*, *PS\_SLOB* - population designations.

| <i>PS_KOCh</i> | <i>PS_SOSN</i> | <i>PS_KISH</i> | <i>PS_LENI</i> | <i>PS_ChER</i> | <i>PS_ROMA</i> | <i>PS_LOKC</i> | <i>PS_SYSO</i> | <i>PS_KRAS</i> | <i>PS_VELI</i> | <i>PS_PYSH</i> | <i>PS_UREN</i> | <i>PS_KORO</i> | <i>PS_KOKSh</i> | <i>PS_KIRS</i> | <i>PS_INZE</i> | <i>PS_SHAB</i> | <i>PS_YEZH</i> | <i>PS_DARO</i> | <i>PS_YURY</i> | <i>PS_SLOB</i> |                 |
|----------------|----------------|----------------|----------------|----------------|----------------|----------------|----------------|----------------|----------------|----------------|----------------|----------------|-----------------|----------------|----------------|----------------|----------------|----------------|----------------|----------------|-----------------|
| 0.140          |                |                |                |                |                |                |                |                |                |                |                |                |                 |                |                |                |                |                |                |                | <i>PS_SOSN</i>  |
| 0.081          | 0.137          |                |                |                |                |                |                |                |                |                |                |                |                 |                |                |                |                |                |                |                | <i>PS_KISH</i>  |
| 0.250          | 0.306          | 0.291          |                |                |                |                |                |                |                |                |                |                |                 |                |                |                |                |                |                |                | <i>PS_LENI</i>  |
| 0.227          | 0.267          | 0.257          | 0.093          |                |                |                |                |                |                |                |                |                |                 |                |                |                |                |                |                |                | <i>PS_ChER</i>  |
| 0.235          | 0.269          | 0.242          | 0.086          | 0.132          |                |                |                |                |                |                |                |                |                 |                |                |                |                |                |                |                | <i>PS_ROMA</i>  |
| 0.595          | 0.615          | 0.606          | 0.585          | 0.543          | 0.591          |                |                |                |                |                |                |                |                 |                |                |                |                |                |                |                | <i>PS_LOKC</i>  |
| 0.625          | 0.637          | 0.629          | 0.620          | 0.576          | 0.619          | 0.271          |                |                |                |                |                |                |                 |                |                |                |                |                |                |                | <i>PS_SYSO</i>  |
| 0.560          | 0.587          | 0.568          | 0.555          | 0.512          | 0.559          | 0.250          | 0.310          |                |                |                |                |                |                 |                |                |                |                |                |                |                | <i>PS_KRAS</i>  |
| 0.574          | 0.601          | 0.588          | 0.559          | 0.523          | 0.567          | 0.296          | 0.356          | 0.145          |                |                |                |                |                 |                |                |                |                |                |                |                | <i>PS_VELI</i>  |
| 0.686          | 0.703          | 0.691          | 0.689          | 0.649          | 0.693          | 0.624          | 0.648          | 0.573          | 0.572          |                |                |                |                 |                |                |                |                |                |                |                | <i>PS_PYSH</i>  |
| 0.701          | 0.722          | 0.706          | 0.704          | 0.662          | 0.701          | 0.647          | 0.675          | 0.599          | 0.599          | 0.378          |                |                |                 |                |                |                |                |                |                |                | <i>PS_UREN</i>  |
| 0.689          | 0.717          | 0.697          | 0.702          | 0.661          | 0.705          | 0.643          | 0.676          | 0.582          | 0.590          | 0.556          | 0.539          |                |                 |                |                |                |                |                |                |                | <i>PS_KORO</i>  |
| 0.675          | 0.694          | 0.679          | 0.686          | 0.647          | 0.689          | 0.647          | 0.669          | 0.587          | 0.606          | 0.547          | 0.539          | 0.267          |                 |                |                |                |                |                |                |                | <i>PS_KOKSh</i> |
| 0.629          | 0.645          | 0.633          | 0.625          | 0.593          | 0.626          | 0.595          | 0.620          | 0.554          | 0.561          | 0.649          | 0.665          | 0.625          | 0.610           |                |                |                |                |                |                |                | <i>PS_KIRS</i>  |
| 0.639          | 0.657          | 0.645          | 0.641          | 0.602          | 0.643          | 0.605          | 0.617          | 0.571          | 0.569          | 0.683          | 0.703          | 0.665          | 0.651           | 0.207          |                |                |                |                |                |                | <i>PS_INZE</i>  |
| 0.589          | 0.615          | 0.598          | 0.586          | 0.561          | 0.601          | 0.583          | 0.606          | 0.530          | 0.574          | 0.615          | 0.620          | 0.615          | 0.603           | 0.495          | 0.514          |                |                |                |                |                | <i>PS_SHAB</i>  |
| 0.641          | 0.667          | 0.659          | 0.652          | 0.621          | 0.656          | 0.635          | 0.652          | 0.574          | 0.620          | 0.715          | 0.731          | 0.693          | 0.676           | 0.578          | 0.589          | 0.391          |                |                |                |                | <i>PS_YEZH</i>  |
| 0.513          | 0.539          | 0.516          | 0.525          | 0.501          | 0.519          | 0.557          | 0.562          | 0.509          | 0.524          | 0.580          | 0.596          | 0.596          | 0.589           | 0.512          | 0.529          | 0.494          | 0.579          |                |                |                | <i>PS_DARO</i>  |
| 0.515          | 0.535          | 0.512          | 0.515          | 0.494          | 0.503          | 0.568          | 0.563          | 0.519          | 0.545          | 0.607          | 0.624          | 0.637          | 0.624           | 0.556          | 0.573          | 0.536          | 0.602          | 0.144          |                |                | <i>PS_YURY</i>  |
| 0.544          | 0.560          | 0.530          | 0.553          | 0.530          | 0.544          | 0.554          | 0.563          | 0.517          | 0.544          | 0.616          | 0.628          | 0.626          | 0.618           | 0.546          | 0.562          | 0.513          | 0.597          | 0.241          | 0.266          |                | <i>PS_SLOB</i>  |
| 0.512          | 0.522          | 0.492          | 0.510          | 0.489          | 0.497          | 0.537          | 0.535          | 0.504          | 0.525          | 0.610          | 0.622          | 0.621          | 0.613           | 0.513          | 0.523          | 0.513          | 0.580          | 0.248          | 0.215          | 0.162          | <i>PS_BELO</i>  |

**Supplementary Table S4.** Pairwise genetic distances ( $D_N$ ) between the populations studied *Pinus sylvestris* L. *PS\_KOCh*, *PS\_SOSN*, *PS\_KISH*, *PS\_LENI*, *PS\_ChER*, *PS\_ROMA*, *PS\_LOKC*, *PS\_SYSO*, *PS\_KRAS*, *PS\_VELI*, *PS\_PYSH*, *PS\_UREN*, *PS\_KORO*, *PS\_KOKSh*, *PS\_KIRS*, *PS\_INZE*, *PS\_SHAB*, *PS\_YEZH*, *PS\_DARO*, *PS\_YURY*, *PS\_SLOB* - population designations.

| <i>PS_KOCh</i> | <i>PS_SOSN</i> | <i>PS_KISH</i> | <i>PS_LENI</i> | <i>PS_ChER</i> | <i>PS_ROMA</i> | <i>PS_LOKC</i> | <i>PS_SYSO</i> | <i>PS_KRAS</i> | <i>PS_VELI</i> | <i>PS_PYSH</i> | <i>PS_UREN</i> | <i>PS_KORO</i> | <i>PS_KOKSh</i> | <i>PS_KIRS</i> | <i>PS_INZE</i> | <i>PS_SHAB</i> | <i>PS_YEZH</i> | <i>PS_DARO</i> | <i>PS_YURY</i> | <i>PS_SLOB</i> |                 |
|----------------|----------------|----------------|----------------|----------------|----------------|----------------|----------------|----------------|----------------|----------------|----------------|----------------|-----------------|----------------|----------------|----------------|----------------|----------------|----------------|----------------|-----------------|
| 0.022          | 0.000          |                |                |                |                |                |                |                |                |                |                |                |                 |                |                |                |                |                |                |                | <i>PS_SOSN</i>  |
| 0.012          | 0.022          | 0.000          |                |                |                |                |                |                |                |                |                |                |                 |                |                |                |                |                |                |                | <i>PS_KISH</i>  |
| 0.045          | 0.051          | 0.048          | 0.000          |                |                |                |                |                |                |                |                |                |                 |                |                |                |                |                |                |                | <i>PS_LENI</i>  |
| 0.036          | 0.041          | 0.037          | 0.018          | 0.000          |                |                |                |                |                |                |                |                |                 |                |                |                |                |                |                |                | <i>PS_ChER</i>  |
| 0.044          | 0.046          | 0.040          | 0.016          | 0.024          | 0.000          |                |                |                |                |                |                |                |                 |                |                |                |                |                |                |                | <i>PS_ROMA</i>  |
| 0.235          | 0.240          | 0.239          | 0.220          | 0.198          | 0.236          | 0.000          |                |                |                |                |                |                |                 |                |                |                |                |                |                |                | <i>PS_LOKC</i>  |
| 0.274          | 0.268          | 0.270          | 0.258          | 0.230          | 0.269          | 0.056          | 0.000          |                |                |                |                |                |                 |                |                |                |                |                |                |                | <i>PS_SYSO</i>  |
| 0.208          | 0.220          | 0.207          | 0.199          | 0.178          | 0.210          | 0.058          | 0.076          | 0.000          |                |                |                |                |                 |                |                |                |                |                |                |                | <i>PS_KRAS</i>  |
| 0.207          | 0.220          | 0.210          | 0.195          | 0.178          | 0.209          | 0.065          | 0.081          | 0.018          | 0.000          |                |                |                |                 |                |                |                |                |                |                |                | <i>PS_VELI</i>  |
| 0.292          | 0.295          | 0.291          | 0.283          | 0.260          | 0.302          | 0.213          | 0.242          | 0.182          | 0.174          | 0.000          |                |                |                 |                |                |                |                |                |                |                | <i>PS_PYSH</i>  |
| 0.313          | 0.322          | 0.310          | 0.293          | 0.274          | 0.307          | 0.235          | 0.274          | 0.208          | 0.202          | 0.055          | 0.000          |                |                 |                |                |                |                |                |                |                | <i>PS_UREN</i>  |
| 0.287          | 0.306          | 0.289          | 0.282          | 0.262          | 0.300          | 0.219          | 0.269          | 0.191          | 0.192          | 0.111          | 0.095          | 0.000          |                 |                |                |                |                |                |                |                | <i>PS_KORO</i>  |
| 0.283          | 0.291          | 0.281          | 0.277          | 0.259          | 0.295          | 0.244          | 0.280          | 0.199          | 0.211          | 0.118          | 0.104          | 0.023          | 0.000           |                |                |                |                |                |                |                | <i>PS_KOKSh</i> |
| 0.239          | 0.244          | 0.241          | 0.231          | 0.210          | 0.241          | 0.219          | 0.242          | 0.194          | 0.193          | 0.208          | 0.222          | 0.192          | 0.191           | 0.000          |                |                |                |                |                |                | <i>PS_KIRS</i>  |
| 0.241          | 0.246          | 0.243          | 0.230          | 0.208          | 0.245          | 0.225          | 0.230          | 0.195          | 0.189          | 0.234          | 0.255          | 0.217          | 0.217           | 0.037          | 0.000          |                |                |                |                |                | <i>PS_INZE</i>  |
| 0.221          | 0.230          | 0.226          | 0.215          | 0.205          | 0.240          | 0.196          | 0.231          | 0.165          | 0.189          | 0.179          | 0.187          | 0.180          | 0.179           | 0.154          | 0.160          | 0.000          |                |                |                |                | <i>PS_SHAB</i>  |
| 0.249          | 0.254          | 0.261          | 0.251          | 0.236          | 0.268          | 0.224          | 0.249          | 0.186          | 0.212          | 0.260          | 0.281          | 0.210          | 0.203           | 0.172          | 0.170          | 0.082          | 0.000          |                |                |                | <i>PS_YEZH</i>  |
| 0.177          | 0.191          | 0.182          | 0.185          | 0.178          | 0.189          | 0.252          | 0.267          | 0.208          | 0.203          | 0.223          | 0.240          | 0.227          | 0.228           | 0.187          | 0.189          | 0.184          | 0.231          | 0.000          |                |                | <i>PS_DARO</i>  |
| 0.172          | 0.185          | 0.170          | 0.171          | 0.167          | 0.169          | 0.255          | 0.261          | 0.209          | 0.213          | 0.252          | 0.280          | 0.277          | 0.271           | 0.227          | 0.225          | 0.223          | 0.253          | 0.045          | 0.000          |                | <i>PS_YURY</i>  |
| 0.196          | 0.199          | 0.187          | 0.200          | 0.192          | 0.200          | 0.211          | 0.227          | 0.196          | 0.204          | 0.231          | 0.242          | 0.237          | 0.234           | 0.202          | 0.210          | 0.192          | 0.236          | 0.088          | 0.094          | 0.000          | <i>PS_SLOB</i>  |
| 0.155          | 0.157          | 0.146          | 0.149          | 0.146          | 0.145          | 0.198          | 0.207          | 0.178          | 0.183          | 0.247          | 0.256          | 0.247          | 0.245           | 0.179          | 0.176          | 0.191          | 0.222          | 0.085          | 0.073          | 0.050          | <i>PS_BELO</i>  |

**Supplementary Table S5.** Regression analysis of genetic and geographical distances.

| Regression statistics |          |
|-----------------------|----------|
| Multiple R            | 0.503437 |
| R-square              | 0.253449 |
| Normalized R-square   | 0.250189 |
| Standard error        | 0.061977 |
| Observations          | 231      |
| Significance F        | 3.02E-16 |

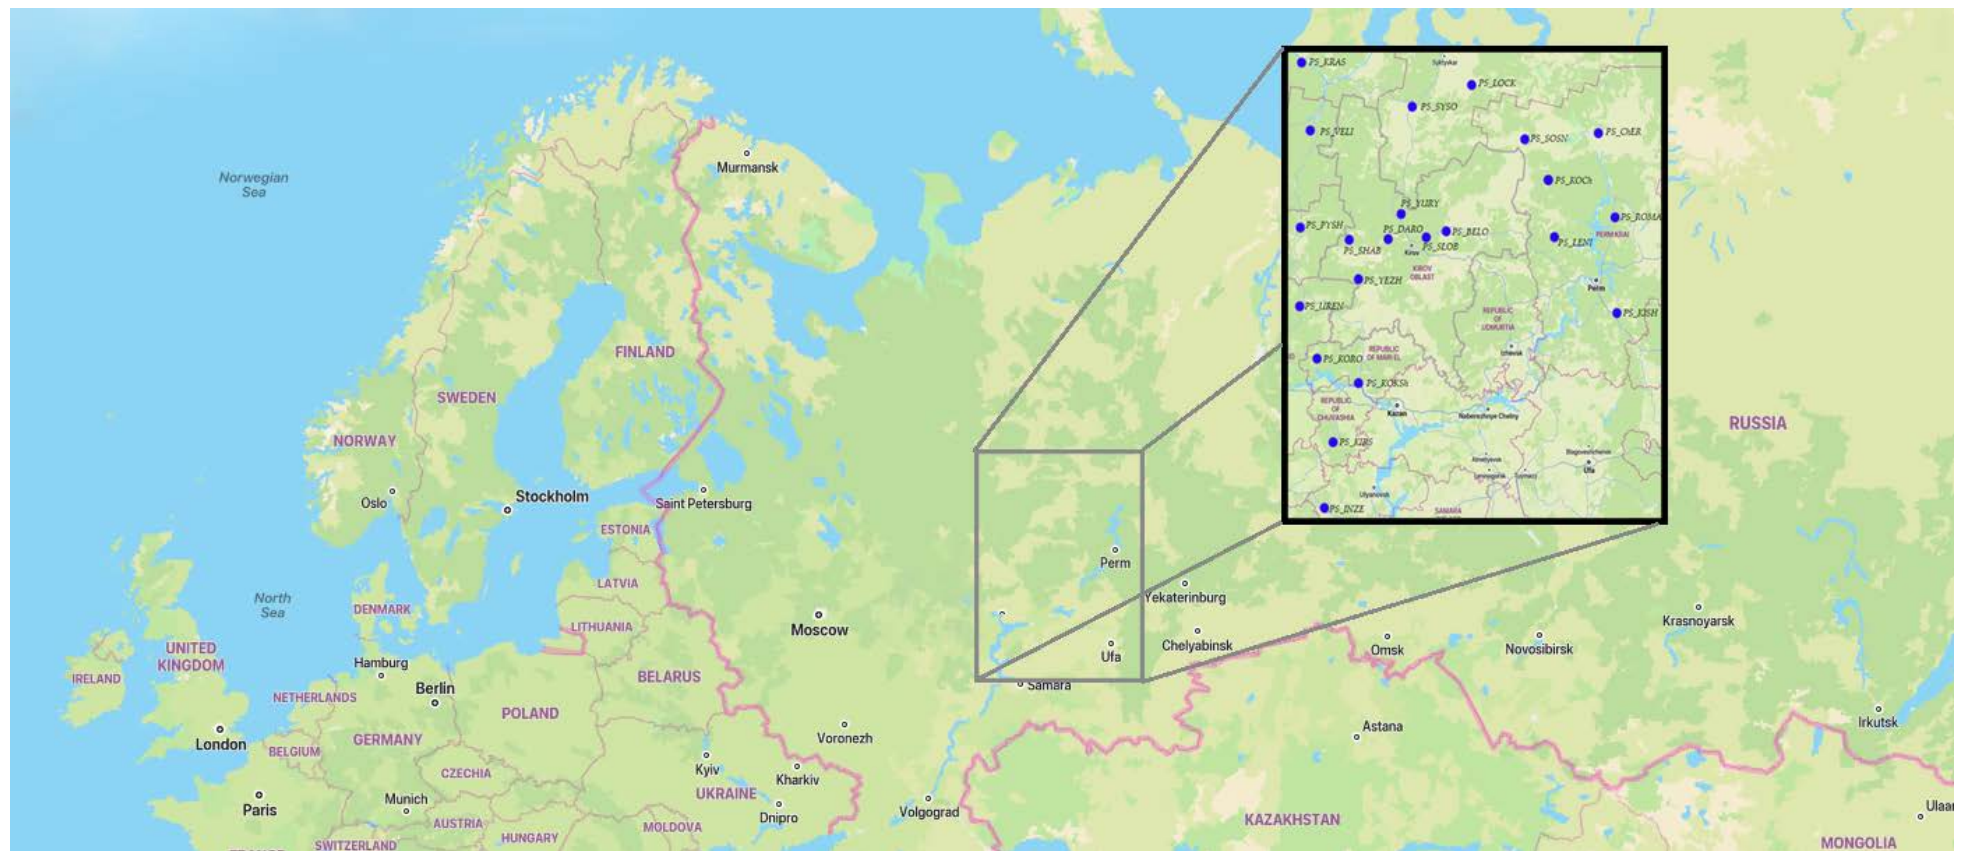

**Supplementary Figure S1.** Schematic map of the location of the studied populations of *P. sylvestris*.

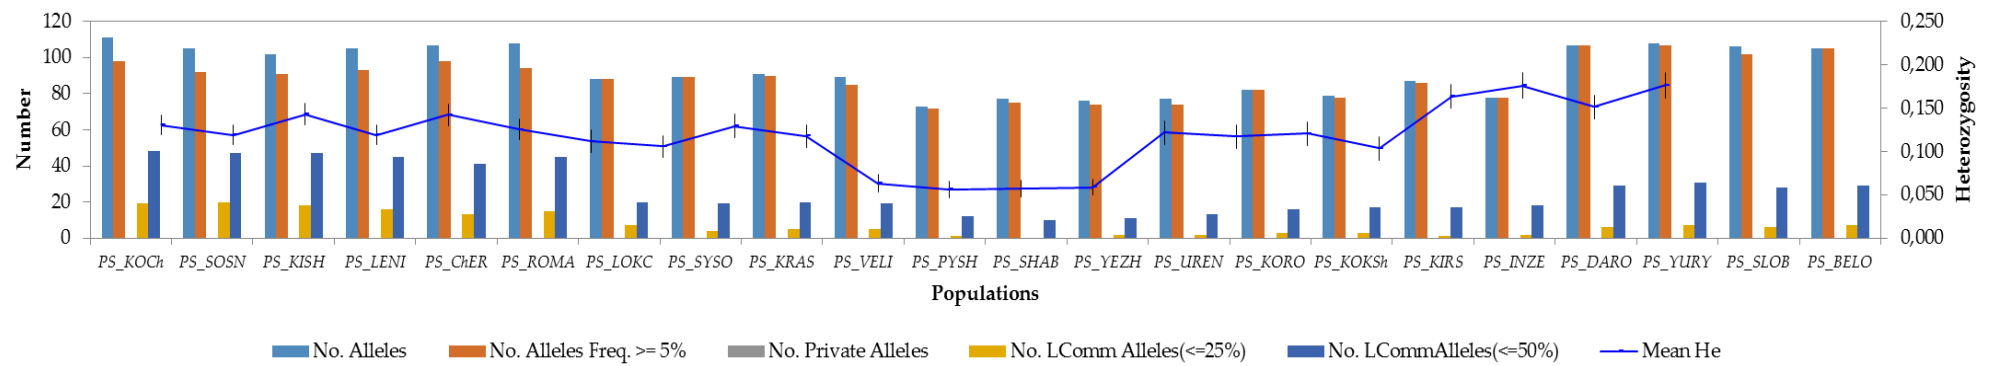

**Supplementary Figure S2.** Allele patterns of *P. sylvestris* populations.

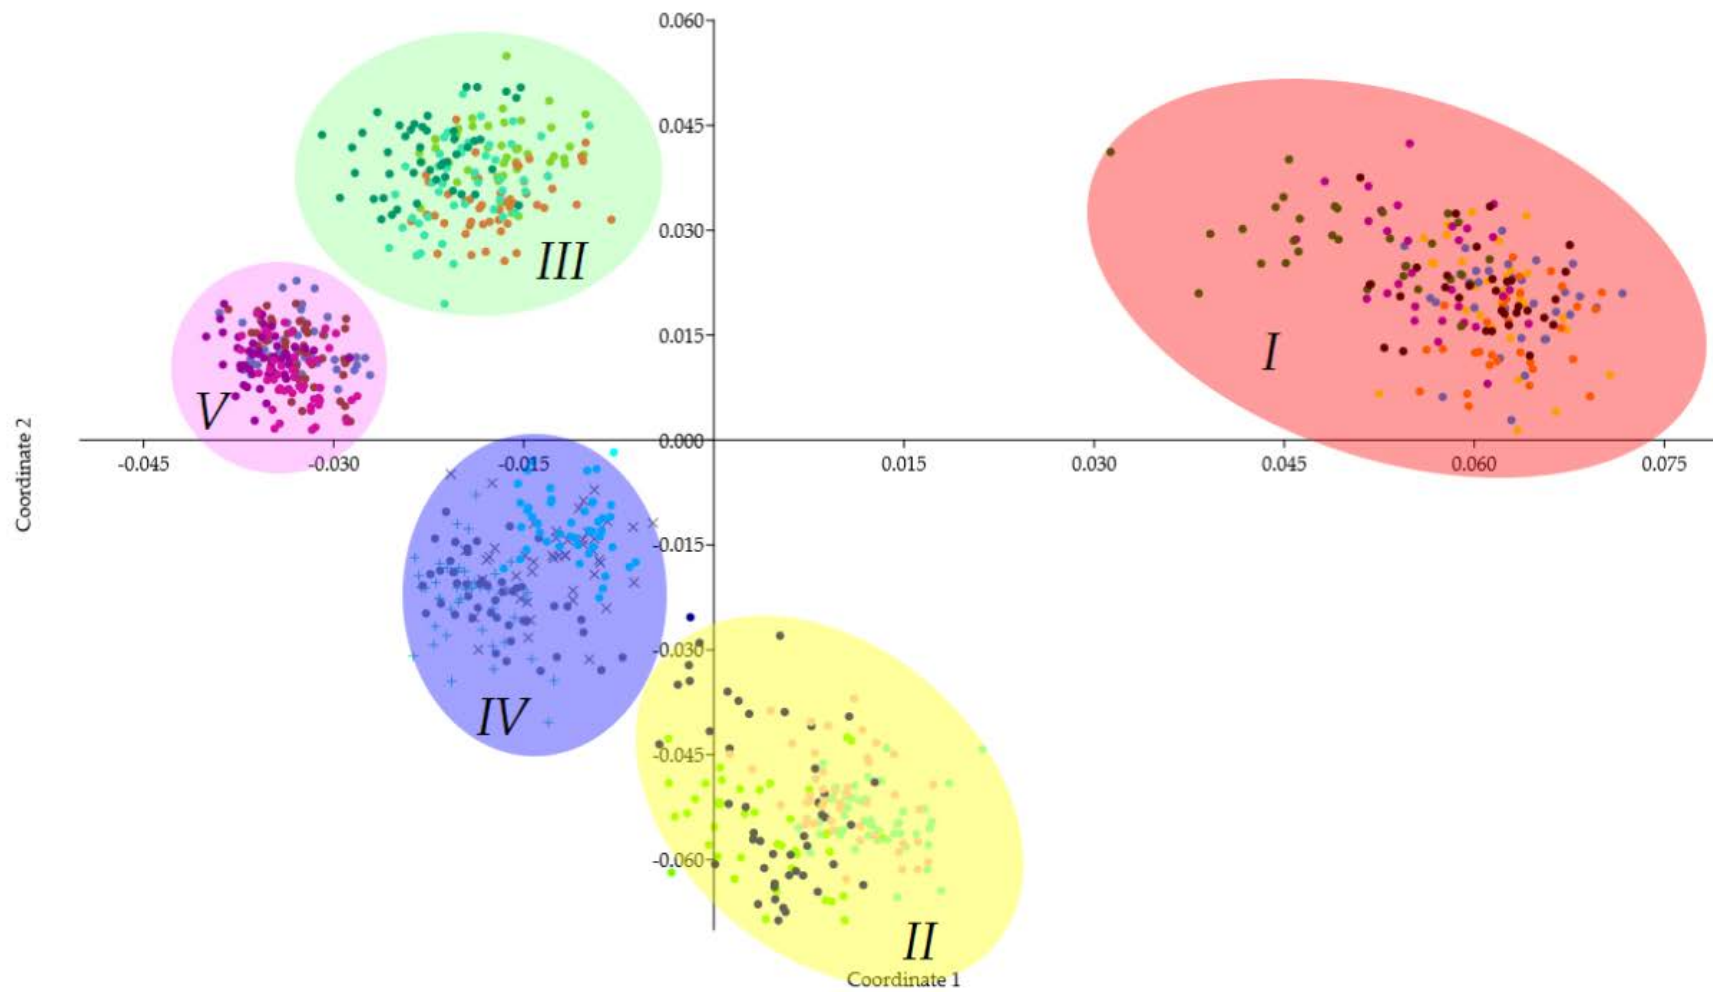

**Supplementary Figure S3.** Ordination of the studied populations of *P. sylvestris* using PCA, obtained on the basis of PhiPT matrix of genetic distances.

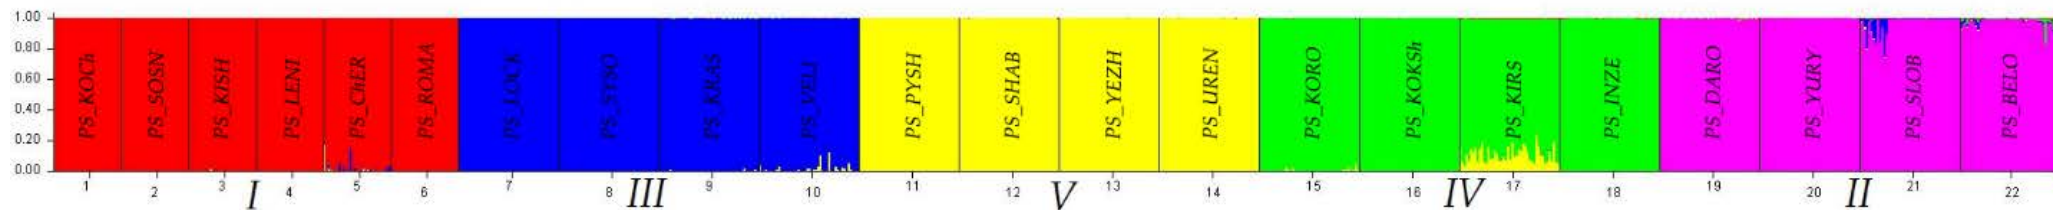

**Supplementary Figure S4.** The structure of the distribution of genotypes in *P. sylvestris* populations at K=5; vertically - the proportion of allele frequencies of the corresponding cluster (posterior probability), horizontally - sample numbers.

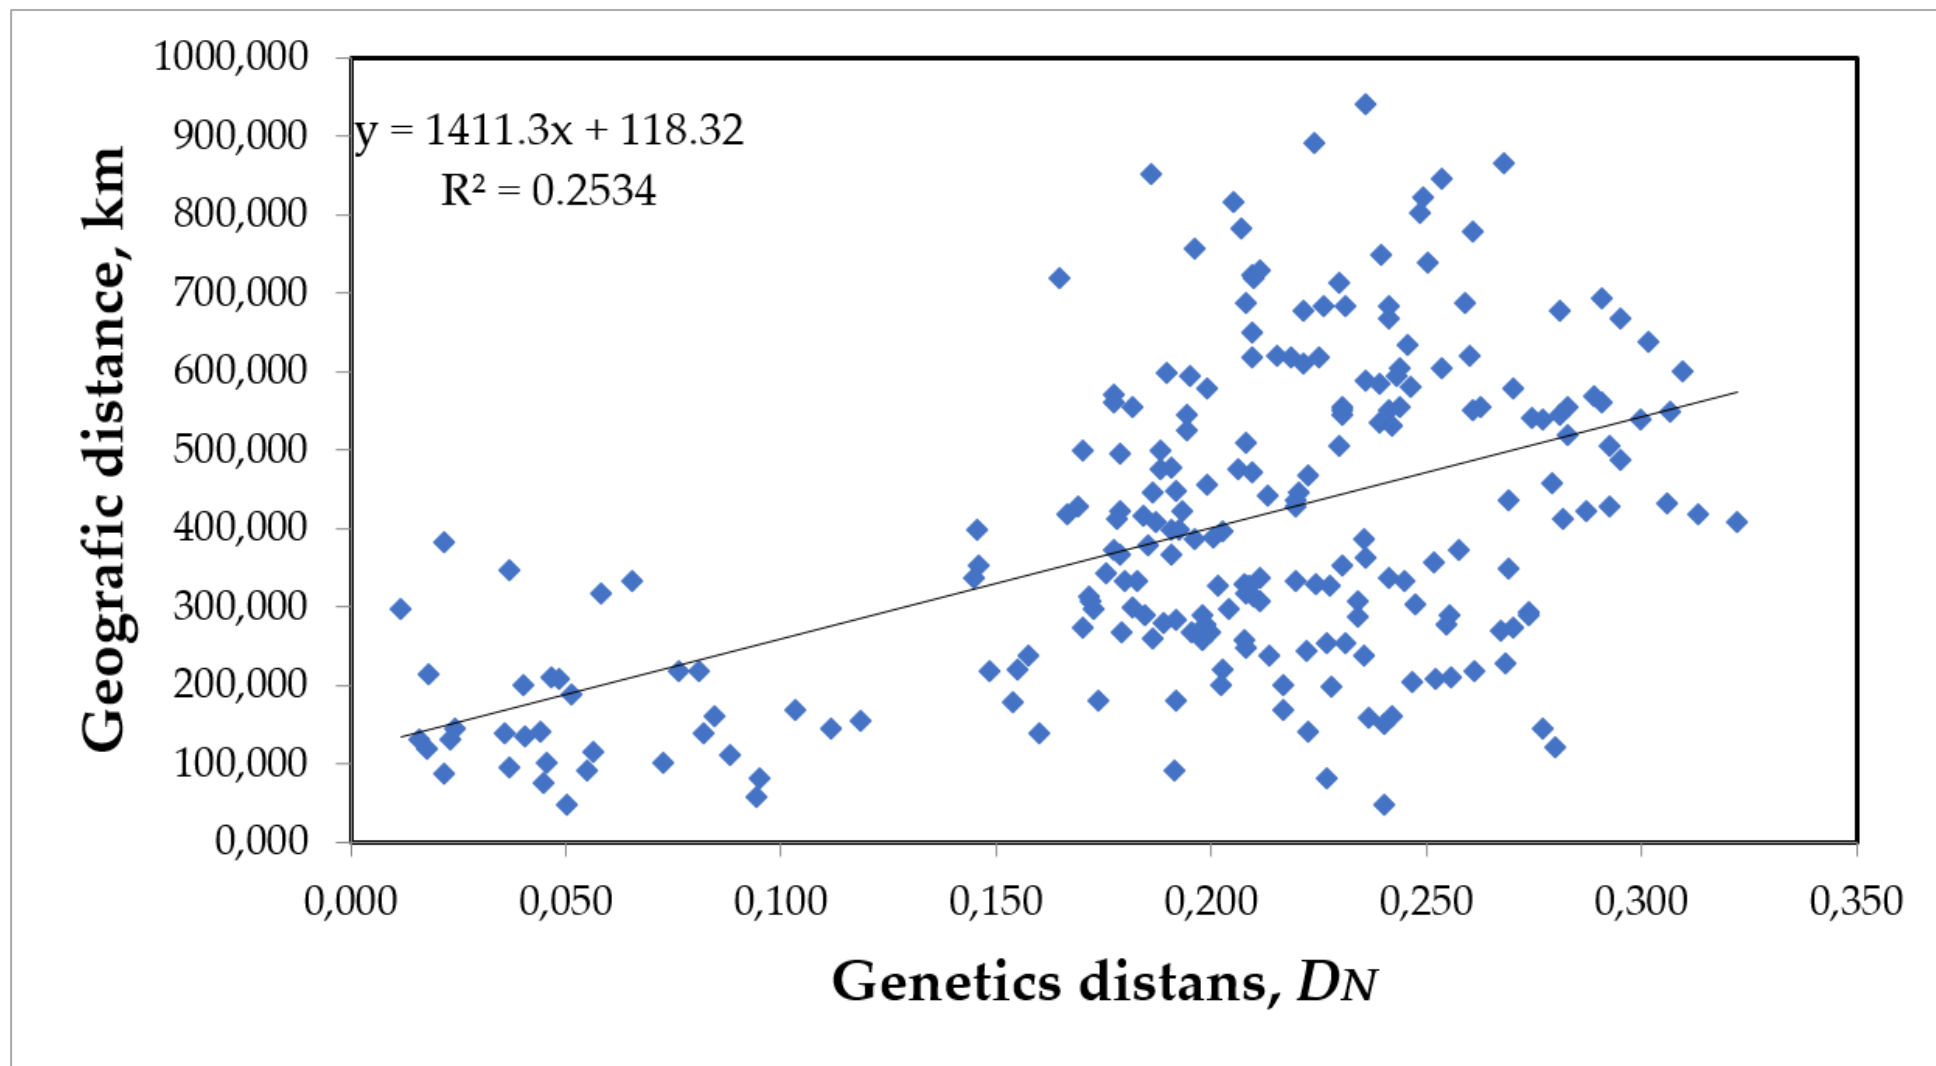

**Supplementary Figure S5.** Graph of dependence of genetic ( $D_N$ ) and geographical distances of *P. sylvestris* populations.
